# Supplementary material for: Multifactorial Analysis of Environmental Metabolomic Data in Ecotoxicology: Wild Marine Mussel Exposed to WWTP Effluent as a Case Study
Source: Metabolites. 2020 Jun 29;10(7):269. doi: 10.3390/metabo10070269 (PMC7407289; doi:10.3390/metabo10070269)
Supplement: Supplementary file 1 [file metabolites-10-00269-s001.xlsx]

## Sheet: Table S1_Annotation
Table S1 : Annotation and identification of metabolites with high effect-specific VIP² value, according to the impact of the Exposure factor or to the Exposure × Gender interaction
									Male exposed		Female exposed
Class compound / Metabolic pathway	Metabolite	HMDB or LipidMaps identifier	Retention Time (min)	Molecular ion species detected	Calculated mass	Observed mass	Mass difference (ppm)	RSD QC % c	Modulation amplitude %	q-value b	Modulation amplitude %	q-value b	Annotation level a	Related factor effect
Lysophosphatidylcholines	LPC(0:0/14:0)	LMGP01050073	13.65	[M-H2O-H]-	448.283	448.283	0.66922	10	-61 ↘	0.059631	-74 ↘	0.000364286	2	Exposure
	LPC(14:0/0:0)	LMGP01050012	13.8167	[M+H]+	468.308	468.308	1.92181	14	-55 ↘	0.0287345	-68 ↘	0.00041125	2	Exposure
	LPC(15:0/0:0)	LMGP01050016	13.2167	[M+H]+	482.324	482.323	1.65864	13	-30 ↘	0.245721	-59 ↘	0.0003	2	Exposure
	LPC(15:0/0:0)	LMGP01050016	14.2833	[H-H·HCOONa]−	548.297	548.296	1.64145	7	-57 ↘	0.0121744	-60 ↘	0.00117172	2	Exposure
	LPC(16:0/0:0)	LMGP01050018	14.4	[M-H2O-H]-	476.314	476.314	0.209945	8	-56 ↘	0.0486577	-71 ↘	0.000247143	2	Exposure
	LPC(P-16:0/0:0)	LMGP01070006	15.0667	[M-H]-	478.33	478.33	1.46342	23	-59 ↘	0.0313721	-67 ↘	0.001386	2	Exposure
	LPC(17:0/0:0)	LMGP01050024	14.8	[M-H2O+H]+	492.345	492.344	2.64042	13	-53 ↘	0.0840318	-71 ↘	0.000316	2	Exposure
	LPC(18:1/0:0)	HMDB0002815	13.9167	[M+H]+	522.355	522.355	1.72296	12	-38 ↘	0.23053	-65 ↘	0.0011925	2	Exposure
	LPC(20:2/0:0)	LMGP01050132	14.32	[M+H]+	548.371	548.37	1.45887	21	-47 ↘	0.252141	-74 ↘	0.00134129	2	Exposure
	LPC(20:1/0:0)	LMGP01050131	14.85	[M+H]+	550.387	550.386	1.63521	13	-42 ↘	0.257638	-72 ↘	0.00109259	2	Exposure
Lysophosphatidylethanolamines	LPE(18:0/0:0)	LMGP02050001	14.2667	[M+H]+	482.324	482.323	1.45131	8	-57 ↘	0.0270007	-66 ↘	0.000570476	2	Exposure
	LPE(18:1/0:0)	HMDB0011505	13.4833	[M-H2O-H]-	460.283	460.283	0.434515	10	-64 ↘	0.0260855	-73 ↘	0.000349	2	Exposure
	LPE(18:2/0:0)	HMDB0011507	13.0667	[M-H2O-H]-	458.267	458.267	0.872853	15	-56 ↘	0.0627289	-72 ↘	0.000324545	2	Exposure
	LPE(20:0/0:0)	LMGP02050012	14.1167	[M+H]+	510.355	510.355	0	11	-31 ↘	0.311767	-65 ↘	0.000646364	2	Exposure
	LPE(20:1/0:0)	LMGP02050020	14.25	[M-H2O-H]-	488.314	488.314	0.819145	20	-57 ↘	0.0971651	-73 ↘	0.000275	2	Exposure
	LPE(P-16:0/0:0)	LMGP02070001	13.7	[M+H]+	438.298	438.297	2.0534	9	-56 ↘	0.0638465	-70 ↘	0.00085	2	Exposure
	LPE(P-18:0/0:0)	LMGP02070002	14.6	[M+H]+	466.329	466.328	1.92997	10	-57 ↘	0.0476993	-72 ↘	0.00026	2	Exposure
	LPE(P-18:1(9Z)/0:0)	HMDB0240599	13.95	[M+H]+	464.314	464.313	1.72297	15	-58 ↘	0.0428382	-72 ↘	0.0002975	2	Exposure
	LPE(22:5/0:0)	HMDB0011525	13.03	[M-H]-	526.294	526.293	2	19	-28 ↘	0.163186	-56 ↘	0.000289231	2	Exposure
	LPE(0:0/16:0)	LMGP02050002	13.4	[M+H]+	454.293	454.292	2	17	-51 ↘	0.143528	-67 ↘	0.00670028	2	Exposure
	LPE(16:0/0:0)	LMGP02050036	13.15	[M-H2O-H]-	434.267	434.267	-0.230273	12	-62 ↘	0.0643917	-74 ↘	0.000969615	2	Exposure
	LPE(P-20:0)	LMGP02070004	15.55	[M-H]-	492.346	492.345	2.03109	11	-55 ↘	0.0472974	-68 ↘	0.000413333	2	Exposure
Acyl carnitines	3-Hydroxyisovalerylcarnitine	LMFA07070041	8.28333	[M-H2O-H]-	242.139	242.139	0.412986	5	-11 ↘	0.00308294	-13 ↘	0.00038	2	Exposure
	3-hydroxytridecanoyl carnitine	HMDB0061639	12.8833	[M+Cl]-	408.252	408.252	1.22473	14	-67 ↘	0.0188552	-65 ↘	0.0009604	2	Exposure
	Heptadecanoyl carnitine	LMFA07070067	14.1333	[M+K]+	452.314	452.313	2.21085	14	-51 ↘	0.124488	-73 ↘	0.00074	2	Exposure
Aryl alkyl ketones	4-Hydroxy-1-(3-pyridinyl)-1-butanone	HMDB0062402	4.43333	[M-H]-	164.072	164.07	7.92337	5	-80 ↘	4.4e-05	-69 ↘	0.00148765	2	Exposure
Ether phospholipids synthesis	DHAP(8:0)	HMDB0011685	4.83333	[M-H]-	277.086	277.086	2.16539	2	-67 ↘	1e-07	-53 ↘	0.000211111	2	Exposure
TCA cycle succinyl-CoA intermediate	Succinylcarnitine	HMDB0061717	2.9	[M+CH3OH+H]+	294.155	294.154	1.69979	17	-78 ↘	0.00870261	-78 ↘	0.00136031	2	Exposure
Purine metabolism	Xanthine	HMDB0000292	1.86667	[M-H]-	151.026	151.025	9.26992	5	-78 ↘	9.85714e-05	-48 ↘	0.0641596	1	Exposure
Tyrosine metabolism	Homovanillin	HMDB0005175	6.9	[M-H2O+H]+	149.06	149.06	4.69609	11	-49 ↘	0.00164	-22 ↘	0.40859	2	Exposure
Catecholamines and Derivatives	N-acetyldopamine	HMDB0041943	4.73333	[M+NH4]+	213.123	213.123	2.34606	22	-76 ↘	0.000178	-37 ↘	0.134188	2	Exposure
Arginine and Derivatives	Asymmetric dimethylarginine	HMDB0001539	2.85	[M+H]+	203.15	203.15	2	6	-68 ↘	0.0124265	-44 ↘	0.189052	2	Exposure
N-acyl-L-alpha-amino acids	N-acetyl-l-alanine	HMDB0000766	2.22	[M-H]-	130.051	130.049	11.5339	10	-49 ↘	0.00363579	-34 ↘	0.0764802	1	Exposure
Unknown	M162T112	-	1.86667	ESI positive	-	162.05	-	4	-53 ↘	0.00157857	-28 ↘	0.292526	4	Exposure
	M203T104	-	1.73333	ESI positive	-	203.004	-	8	-59 ↘	0.00289938	-34 ↘	0.088702	4	Exposure
	M245T259	-	4.32	ESI negative	-	245.114	-	11	-52 ↘	0.0187718	-51 ↘	0.0137993	4	Exposure
	M251T521	-	8.68333	ESI negative	-	250.962	-	26	-82 ↘	0.000204545	-64 ↘	0.0124768	4	Exposure
	M258T874	-	14.5667	ESI negative	-	258.051	-	2	-6 ↘	0.0555557	-10 ↘	0.000388824	4	Exposure
	M299T896	-	14.9333	ESI negative	-	299.095	-	12	-17 ↘	0.031208	-25 ↘	0.00084625	4	Exposure
	M328T487	-	8.11667	ESI negative	-	328.151	-	5	-78 ↘	3e-05	-39 ↘	0.189245	4	Exposure
	M355T536	-	8.93333	ESI negative	-	355.223	-	4	-12 ↘	0.0279634	-17 ↘	0.000494737	4	Exposure
	M469T118	-	1.96667	ESI positive	-	469.096	-	17	-63 ↘	0.00161933	-35 ↘	0.198264	4	Exposure
	M261T562	-	9.37	ESI positive	-	261.144	-	6	-67 ↘	0.00473476	-44 ↘	0.23822	4	Exposure
	M680T808	-	13.47	ESI negative	-	680.317	-	11	-41 ↘	0.217252	-74 ↘	0.00022375	4	Exposure
	M267T784_1	-	13.07	ESI positive	-	266.639	-	17	-27 ↘	0.441872	-60 ↘	0.000407333	4	Exposure
	M450T112	-	1.87	ESI positive	-	449.973	-	6	-55 ↘	0.00354389	-33 ↘	0.270366	4	Exposure
	M360T525	-	8.75	ESI negative	-	360.141	-	6	-66 ↘	0.000113333	-30 ↘	0.250753	4	Exposure
	M504T823	-	13.72	ESI negative	-	504.271	-	9	-54 ↘	0.0755861	-69 ↘	0.0005365	4	Exposure
	M491T704	-	11.73	ESI negative	-	491.119	-	6	+22 ↗	0.0001025	+8 ↗	0.210142	4	Exposure
	M407T470	-	7.83	ESI positive	-	407.228	-	18	-51 ↘	0.00785545	-31 ↘	0.215997	4	Exposure
Table S1 (continue)
									Male exposed		Female exposed
Class compound / Metabolic pathway	Metabolite	HMDB or LipidsMap identifier	Retention Time (min)	Molecular ion species detected	Calculated mass	Observed mass	Mass difference (ppm)	RSD QC % c	Modulation amplitude %	q-value b	Modulation amplitude %	q-value b	Annotation level a	Related factor effect
Lysophosphatidylethanolamines	LPE(20:4/0:0)	HMDB0011518	13.2	[M-H]-	500.2783	500.278	0.799555	11	+23 ↗	0.860768	-71 ↘	0.0134775	2	Exposure x Gender
	LPE(O-16:0/0:0)	LMGP02060002	12.55	[M+FA-H]-	484.3045	484.304	1.03241	8	+104 ↗	0.0889908	-43 ↘	0.548427	2	Exposure x Gender
	LPE(O-18:0)	LMGP02060003	13.4667	[M+H]+	468.3448	468.344	1.70814	25	+205 ↗	0.051506	-61 ↘	0.480867	2	Exposure x Gender
Lysophosphatidylcholines	LPC(20:5/0:0)	LMGP01050050	13.0333	[M+H]+	542.3241	542.323	1.84392	17	=	1	-60 ↘	0.00142879	2	Exposure x Gender
	LPC(O-16:0/0:0)	LMGP01060010	13.9833	[M+H]+	482.3605	482.36	1.65851	16	+162 ↗	0.0578548	-54 ↘	0.57824	2	Exposure x Gender
	LPC(18:3/0:0)	LMGP01050128	12.9833	[M+H]+	518.3241	518.323	2	9.88808	+2 ↗	1	-52 ↘	0.00464286	2	Exposure x Gender
	LPC(P-16:0/0:0)	LMGP01070006	13.3167	[M+FA-H]-	524.3358	524.335	1.1443	11	+137 ↗	0.0471963	-44 ↘	0.562356	2	Exposure x Gender
	LPC(P-18:0/0:0)	LMGP01070009	15.0833	[M+FA-H]-	552.3671	552.366	1.62935	20	+108 ↗	0.194764	-59 ↘	0.248388	2	Exposure x Gender
Glycerophosphocholines	Glycerophosphocholine	HMDB0000086	1.61667	[M+ACN+H]+	299.1366	299.136	2	9	-14 ↘	0.365498	+18 ↗	0.252017	2	Exposure x Gender
Glycerophosphates	1-pentadecanoyl-glycero-3-phosphate	LMGP10050037	7.76667	[M+K-2H]2-	433.1763	433.176	1	20	-63 ↘	0.0115408	+16 ↗	0.901768	2	Exposure x Gender
Unsaturated fatty acids	FA(20:2)	-	13.95	[M-H]-	307.2643	307.264	2.27817	29	+37 ↗	0.605635	-64 ↘	0.00723135	2	Exposure x Gender
	FA 18:4;O3	-	18.9167	[M-H2O+H]+	307.1904	307.19	1	25.3816	-17 ↘	0.495885	+30 ↗	0.229489	2	Exposure x Gender
Phosphatidylserines	PS(22:0)	-	13.9667	[M-H]-	594.3413	594.339	3.53332	13	+144 ↗	0.0741453	-59 ↘	0.447246	2	Exposure x Gender
Sterol lipids	ST 24:6;O6	LMST01130017	13.37	[M+Na]+	437.1935	437.192	3	20	-7 ↘	0.756643	+21 ↗	0.0917678	2	Exposure x Gender
Cholesterol metabolism or Steroids biosynthesis	Cholesteryl acetate or 3-β-Hydroxy-4-β-methyl-5-α-cholest-7-ene-4-α-carbaldehyde	HMDB0003822 or HMDB0059643	17.6167	[M+H]+	429.373	429.372	1.63029	17	-9 ↘	0.216198	+10 ↗	0.240057	2	Exposure x Gender
Sphingolipids metabolism	Phytosphingosine-1-p	HMDB0012280	11.4167	[M+FA-H]-	442.257	442.257	1.13056	5	+44 ↗	0.386681	-44 ↘	0.114546	2	Exposure x Gender
	Sm(d18:0/14:1(9z)(oh))	HMDB0013462	14.1833	[M-H]-	687.508	687.508	0.581811	7	+147 ↗	0.0987512	-51 ↘	0.559678	2	Exposure x Gender
	Sm(d18:0/14:1(9z)(oh))	HMDB0013462	15.1333	[M-H]-	687.508	687.508	0.872717	18	+60 ↗	0.135632	-45 ↘	0.228761	2	Exposure x Gender
Glycosphingolipids	Glucosylsphingosine	LMSP05010031	12.65	[M+Cl]-	496.305	496.304	1.00745	19	+106 ↗	0.122979	-51 ↘	0.353262	2	Exposure x Gender
Acyl carnitines	Pentadecanoylcarnitine	HMDB0062517	11.85	[M+K]+	424.282	424.281	3.064	19	+96 ↗	0.048578	-34 ↘	0.555117	2	Exposure x Gender
	3-hydroxytridecanoyl carnitine	HMDB0061639	11.8667	[M+Cl]-	408.252	408.252	0.244947	19	+89 ↗	0.0477052	-41 ↘	0.335751	2	Exposure x Gender
	Hydroxypropionylcarnitine	LMFA07070074	3.33333	[M-H2O-H]-	214.108	214.107	1.86822	25	-30 ↘	0.125488	+48 ↗	0.0879572	2	Exposure x Gender
Fatty amides	N-stearoyltaurine	LMFA08020078	14.45	[M-H]-	390.268	390.268	1.02494	16	+51 ↗	0.651091	-69 ↘	0.0869523	2	Exposure x Gender
	N-Palmitoyl phenylalanine	LMFA08020091	12.1833	[M+Na]+	426.298	426.297	2.34578	11	+87 ↗	0.136088	-47 ↘	0.42381	2	Exposure x Gender
	N-Stearoyl phenylalanine	LMFA08020093	13.0167	[M+Na]+	454.329	454.328	2.20105	10	+148 ↗	0.0572547	-49 ↘	0.55792	2	Exposure x Gender
Tryptophan metabolism	L-kynurenine	HMDB0000684	7.58	[M+H]+	209.092	209.092	2	3	-63 ↘	0.0317438	+25 ↗	0.845359	1	Exposure x Gender
	N'-formylkynurenine	HMDB0001200	7.27	[M-H]-	235.072	235.072	3	8	-55 ↘	0.0384742	+25 ↗	0.892918	1	Exposure x Gender
Beta-alanine metabolism	3-Aminopropionaldehyde	HMDB0001106	13.3167	[2M+Na]+	169.095	169.093	8.27938	8	-5 ↘	0.852804	+22 ↗	0.0134085	2	Exposure x Gender
Urea cycle; Amino acids metabolism; Product of the enzyme monoamine oxidase A	N4-Acetylaminobutanal	HMDB0004226	4.37	[M+H]+	130.086	130.086	2	15.4455	+151 ↗	0.0858775	-28 ↘	0.907612	2	Exposure x Gender
Unknown	M136T659	-	10.9833	ESI positive	-	136.021	-	9	-59 ↘	2.33333e-05	+37 ↗	0.230172	4	Exposure x Gender
	M174T884	-	14.7333	ESI positive	-	174.127	-	8	-65 ↘	4.5e-05	+34 ↗	0.483335	4	Exposure x Gender
	M192T827	-	13.7833	ESI positive	-	192.084	-	12	-63 ↘	0.000101111	+25 ↗	0.805164	4	Exposure x Gender
	M228T138	-	2.3	ESI negative	-	228.054	-	16	-27 ↘	0.626068	+86 ↗	0.0654265	4	Exposure x Gender
	M262T155	-	2.58333	ESI positive	-	262.187	-	14	+153 ↗	0.0043145	-4 ↘	1	4	Exposure x Gender
	M277T550	-	9.16667	ESI negative	-	277.033	-	11	-14 ↘	0.0354919	+7 ↗	0.547198	4	Exposure x Gender
	M293T92	-	1.53333	ESI positive	-	293.089	-	10	-16 ↘	0.30826	+31 ↗	0.0648223	4	Exposure x Gender
	M316T549	-	9.15	ESI negative	-	316.151	-	22	-60 ↘	0.000420833	+2 ↗	0.999724	4	Exposure x Gender
	M387T675	-	11.25	ESI negative	-	387.099	-	12	-9 ↘	0.117132	+9 ↗	0.212964	4	Exposure x Gender
	M448T445	-	7.41667	ESI negative	-	448.139	-	11	-49 ↘	0.0835136	+85 ↗	0.0615064	4	Exposure x Gender
	M456T707	-	11.7833	ESI negative	-	456.273	-	12	+50 ↗	0.349792	-48 ↘	0.14941	4	Exposure x Gender
	M468T712	-	11.8667	ESI negative	-	468.272	-	6	+82 ↗	0.0488563	-34 ↘	0.456433	4	Exposure x Gender
	M470T730	-	12.1667	ESI negative	-	470.288	-	6	+69 ↗	0.150343	-41 ↘	0.425754	4	Exposure x Gender
	M505T754	-	12.5667	ESI negative	-	505.341	-	9	+121 ↗	0.0613689	-51 ↘	0.355745	4	Exposure x Gender
	M505T838	-	13.9667	ESI negative	-	505.313	-	29	+91 ↗	0.248228	-59 ↘	0.252279	4	Exposure x Gender
	M533T762	-	12.7	ESI negative	-	533.336	-	5	+69 ↗	0.0974589	-37 ↘	0.48451	4	Exposure x Gender
	M542T774	-	12.9	ESI negative	-	542.346	-	20	+156 ↗	0.0350392	-50 ↘	0.567138	4	Exposure x Gender
	M550T819	-	13.65	ESI negative	-	550.349	-	22	+124 ↗	0.163796	-56 ↘	0.437858	4	Exposure x Gender
	M556T808	-	13.4667	ESI negative	-	556.361	-	9	+164 ↗	0.0478989	-55 ↘	0.562109	4	Exposure x Gender
	M586T801	-	13.35	ESI negative	-	586.372	-	19	+146 ↗	0.102249	-66 ↘	0.446065	4	Exposure x Gender
	M496T869	-	14.4833	ESI positive	-	496.375	-	15.4455	+174 ↗	0.136245	-63 ↘	0.580612	4	Exposure x Gender
Annotation level 1: metabolite identity confirmed by injection of the corresponding analytical standard in the same analytical conditions.
Annotation level 2: putative annotation, based upon physicochemical properties and/or spectral similarity with public spectral libraries.
Annotation level 4 : unknown compound
a Based on the work of Sumner et al. (2007).
b p-value provided after Benjamini-Hochberg FDR correction
c RSD: Relative Standard Deviation calculated for each feature detected in Quality Control (QC) sample injected throughout the analytical sequence (analytical variability).

## Sheet: Table S2_ANOVA
Table S2: Two-way ANOVA tests in conjunction with Tukey’s multiple comparison test, followed by the Benjamini-Hochberg FRD correction
	Metabolites of interest (reported in Table S1)	ANOVA two-way p-value			Tukey multiple pairwise-comparisons adjusted p-value						Benjamini-Hochberg FDR Correction q-value
MT	Annotation/Identification	Exposure	Gender	Exposure*Gender	F_C vs F_E	M_C vs F_C	M_E vs F_C	M_C vs F_E	M_E vs F_E	M_C vs M_E	F_C vs F_E	M_C vs F_C	M_E vs F_C	M_C vs F_E	M_E vs F_E	M_C vs M_E
M277T290	DHAP(8:0)	4.41e-11	0.6435	0.0927	1.9e-05	0.411492	1.4e-06	3e-07	0.819626	1e-09	0.000211111	1	0.00014	3e-05	1	1e-07
M164T266	4-Hydroxy-1-(3-pyridinyl)-1-butanone	8.75e-09	0.428	0.175	0.0005058	0.418729	0.0001594	6.9e-06	0.979269	2.2e-06	0.00148765	1	0.000937647	0.000345	1	4.4e-05
M242T497	3-Hydroxyisovalerylcarnitine	1.76e-08	0.794	0.372	7.6e-06	0.838938	2.87e-05	0.0001471	0.970606	0.0005241	0.00038	1	0.00035875	0.002942	1	0.00308294
M251T521	M251T521	2.22e-07	0.864	0.175	0.0047412	0.684392	0.0004357	0.0002614	0.834127	2.25e-05	0.0124768	1	0.0016137	0.00435667	1	0.000204545
M466T876	LPE(P-18:0/0:0)	2.73e-07	0.1054	0.0697	7.8e-06	0.0773704	1.1e-05	0.0162654	0.999463	0.0214647	0.00026	0.552646	0.00055	0.0492891	1	0.0476993
M468T712	M468T712	2.73e-07	0.0424	0.0019	0.369711	0.785035	0.140165	0.911422	0.0025801	0.0195425	0.456433	1	0.237568	1	0.0430017	0.0488563
M328T487	M328T487	2.74e-07	0.51367	0.00335	0.104085	0.0478039	0.0013446	8.78e-05	0.327265	6e-07	0.189245	0.597549	0.00407455	0.002195	0.606046	3e-05
M464T837	LPE(P-18:1(9Z)/0:0)	3.01e-07	0.1899	0.0991	1.19e-05	0.158594	2.33e-05	0.0092824	0.995979	0.0162785	0.0002975	0.881077	0.000466	0.0331514	1	0.0428382
M460T809	LPE(18:1/0:0)	3.54e-07	0.233	0.226	3.49e-05	0.323845	3.4e-05	0.0077418	1	0.0075648	0.000349	0.981349	0.00034	0.0322575	1	0.0260855
M151T112	Xanthine	4.35e-07	0.9287	0.0383	0.0288718	0.460029	0.0004061	0.000656	0.410513	6.9e-06	0.0641596	0.978785	0.0016244	0.00937143	0.707781	9.85714e-05
M476T864	LPC(16:0/0:0)	4.5e-07	0.21	0.108	1.73e-05	0.825144	3.53e-05	0.0105316	0.995248	0.0189765	0.000247143	1	0.000320909	0.0363159	1	0.0486577
M468T829	LPC(14:0/0:0)	6.77e-07	0.662	0.266	6.58e-05	0.681244	0.0002691	0.0025527	0.964561	0.0089077	0.00041125	1	0.00128143	0.0196362	1	0.0287345
M294T174	Succinylcarnitine	8.46e-07	0.633	0.77	0.0004353	0.946797	0.0002893	0.0029221	0.999021	0.0020016	0.00136031	1	0.001315	0.0194807	1	0.00870261
M355T536	M355T536	8.87e-07	0.738	0.301	9.4e-05	0.757809	0.0004017	0.0024473	0.960789	0.0089483	0.000494737	1	0.00167375	0.0203942	1	0.0279634
M452T848	Heptadecanoyl carnitine	9.21e-07	0.0647	0.0268	7.4e-06	0.0251834	1.56e-05	0.0507461	0.994701	0.0858964	0.00074	0.419723	0.00039	0.101492	1	0.124488
M482T856	LPE(18:0/0:0)	9.43e-07	0.432	0.341	0.0001198	0.602478	0.0001632	0.0061881	0.999592	0.0081002	0.000570476	1	0.000906667	0.0294671	1	0.0270007
M548T857	LPC(15:0/0:0)	9.51e-07	0.492	0.647	0.0003398	0.847053	0.0002022	0.0048689	0.998029	0.0030436	0.00117172	1	0.001011	0.0270494	1	0.0121744
M492T888	LPC(17:0/0:0)	9.66e-07	0.1007	0.0574	1.58e-05	0.0645013	2.57e-05	0.0349148	0.998451	0.0504191	0.000316	0.537511	0.000367143	0.0759017	1	0.0840318
M408T773	3-hydroxytridecanoyl carnitine	1.02e-06	0.117	0.502	0.0002401	0.388672	3.16e-05	0.0278855	0.904793	0.0050909	0.0009604	1	0.000351111	0.06485	1	0.0188552
M488T855	LPE(20:1/0:0)	1.16e-06	0.0467	0.0515	1.65e-05	0.0323523	1.33e-05	0.0714095	0.999864	0.061214	0.000275	0.462176	0.000443333	0.137326	1	0.0971651
M458T784	LPE(18:2/0:0)	1.3e-06	0.214	0.105	3.57e-05	0.181081	7.66e-05	0.0192335	0.994154	0.0351282	0.000324545	0.787308	0.000547143	0.0534264	1	0.0627289
M448T819	LPC(0:0/14:0)	1.49e-06	0.174	0.131	5.1e-05	0.181125	6.52e-05	0.0255442	0.999797	0.0310081	0.000364286	0.754687	0.000501538	0.0654979	1	0.059631
M492T933	LPE(P-20:0)	1.5e-06	0.293	0.183	7.44e-05	0.33006	0.0001286	0.0141948	0.997774	0.0222298	0.000413333	0.970765	0.00080375	0.0443588	1	0.0472974
M258T874	M258T874	1.72e-06	0.656	0.157	6.61e-05	0.539061	0.0005061	0.0048404	0.901451	0.0272223	0.000388824	1	0.0018075	0.0284729	1	0.0555557
M213T284	N-acetyldopamine	1.74e-06	0.1541	0.0348	0.0697777	0.943908	6.32e-05	0.0222387	0.0657011	1.78e-05	0.134188	1	0.000526667	0.0585229	0.164253	0.000178
M491T704	M491T704	1.78e-06	0.0636	0.0146	0.123984	0.957227	2.45e-05	0.047638	0.0161548	8.2e-06	0.210142	1	0.000408333	0.101357	0.0673117	0.0001025
M299T896	M299T896	2.16e-06	0.0963	0.3623	0.0002031	0.951032	0.0339395	6.07e-05	0.259762	0.0109228	0.00084625	1	0.067879	0.00202333	0.519523	0.031208
M360T525	M360T525	2.53e-06	0.99238	0.00993	0.168005	0.227533	0.0015874	0.00167	0.243005	6.8e-06	0.250753	0.842716	0.00466882	0.0167	0.495929	0.000113333
M478T904	LPC(P-16:0/0:0)	2.94e-06	0.632	0.465	0.0004158	0.822006	0.0006806	0.0067015	0.998247	0.0103528	0.001386	1	0.00226867	0.0304614	1	0.0313721
M504T823	M504T823	3.58e-06	0.222	0.147	0.0001073	0.234378	0.0001636	0.032249	0.998968	0.0445958	0.0005365	0.837064	0.000861053	0.0716644	1	0.0755861
M680T808	M680T808	4e-06	0.504	0.0242	1.79e-05	0.154605	0.0005693	0.0135678	0.655508	0.171629	0.00022375	0.909441	0.0019631	0.0437671	1	0.217252
M438T822	LPE(P-16:0/0:0)	4.61e-06	0.396	0.213	0.0001955	0.443431	0.0004308	0.0185718	0.993136	0.0351156	0.00085	0.985401	0.00165692	0.0530623	1	0.0638465
M526T782	LPE(22:5/0:0)	5.34e-06	0.595	0.046	3.76e-05	0.686963	0.0073665	0.0014933	0.277546	0.125653	0.000289231	1	0.016742	0.0165922	0.533743	0.163186
M434T789	LPE(16:0/0:0)	5.44e-06	0.312	0.236	0.0002521	0.403736	0.0003446	0.0271361	0.999565	0.0347715	0.000969615	1	0.00149826	0.0661856	1	0.0643917
M482T793	LPC(15:0/0:0)	7.98e-06	0.5065	0.0302	3.6e-05	0.177338	0.0009196	0.0199211	0.695208	0.201491	0.0003	0.844468	0.00296645	0.0538408	1	0.245721
M203T104	M203T104	1.09e-05	0.0898	0.2138	0.043464	0.989527	0.0001264	0.100896	0.162519	0.0004639	0.088702	1	0.000842667	0.183447	0.345785	0.00289938
M130T133	N-acetyl-l-alanine	1.34e-05	0.801	0.277	0.0351809	0.926754	0.0029682	0.0091151	0.77638	0.0006908	0.0764802	1	0.008245	0.0337596	1	0.00363579
M245T259	M245T259	1.34e-05	0.94	0.931	0.0056577	0.999439	0.0055506	0.005355	1	0.0052561	0.0137993	0.999439	0.0132157	0.0281842	1	0.0187718
M469T118	M469T118	1.91e-05	0.5942	0.0936	0.111028	0.825144	0.0021581	0.0178237	0.398622	0.0002429	0.198264	1	0.006166	0.0524226	0.699336	0.00161933
M267T784_1	M267T784_1	2.84e-05	0.314	0.0195	6.11e-05	0.0831348	0.0010815	0.0724287	0.764151	0.402103	0.000407333	0.554232	0.00337969	0.136658	1	0.441872
M510T847	LPE(20:0/0:0)	3.35e-05	0.7787	0.0465	0.0001422	0.580609	0.0144281	0.0078948	0.36891	0.271237	0.000646364	1	0.0313654	0.0315792	0.670746	0.311767
M522T835	LPC(18:1/0:0)	3.76e-05	0.7206	0.0965	0.0003339	0.462812	0.004744	0.0264617	0.787547	0.186729	0.0011925	0.964193	0.01186	0.0661542	1	0.23053
M162T112	M162T112	3.93e-05	0.4938	0.0568	0.204768	0.248939	0.0321355	0.0026065	0.815838	0.000221	0.292526	0.829796	0.0655827	0.0186179	1	0.00157857
M550T891	LPC(20:1/0:0)	4.12e-05	0.6716	0.0803	0.000295	0.397856	0.0044318	0.0315423	0.778262	0.218992	0.00109259	1	0.0113636	0.071687	1	0.257638
M548T859	LPC(20:2/0:0)	5e-05	0.5179	0.0969	0.0004158	0.350125	0.0032651	0.0507046	0.887728	0.211799	0.00134129	1	0.00882459	0.103479	1	0.252141
M149T414	Homovanillin	6.12e-05	0.7656	0.0393	0.302356	0.317039	0.0214039	0.007285	0.582581	0.0002132	0.40859	0.990747	0.0455402	0.0316739	0.970968	0.00164
M450T112	M450T112	7.67e-05	0.309	0.103	0.186553	0.238054	0.0795216	0.0021022	0.973199	0.0006379	0.270366	0.820876	0.147262	0.0191109	1	0.00354389
M261T562	M261T562	7.91e-05	0.597	0.147	0.150078	0.486501	0.0368475	0.0058567	0.913808	0.0009943	0.23822	0.973002	0.07225	0.0292835	1	0.00473476
M454T804	LPE(0:0/16:0)	8.84e-05	0.634	0.315	0.0024121	0.712336	0.0065883	0.048885	0.982845	0.106211	0.00670028	1	0.0153216	0.101844	1	0.143528
M407T470	M407T470	8.96e-05	0.799	0.211	0.123118	0.88279	0.0100364	0.0275506	0.707874	0.0017282	0.215997	1	0.0223031	0.0655967	1	0.00785545
M203T171	Asymmetric dimethylarginine	0.000113	0.472373	0.301024	0.102088	0.994701	0.0048601	0.0692546	0.598297	0.0032309	0.189052	1	0.0118539	0.135793	0.980815	0.0124265
M316T549	M316T549	0.00118	0.268066	0.000573	0.999724	0.0067542	0.316696	0.0085461	0.274207	5.05e-05	0.999724	0.168855	0.452423	0.0328696	0.537662	0.000420833
M192T827	M192T827	0.00237	0.03205	2.92e-05	0.772957	9.18e-05	0.858742	0.001417	0.314599	9.1e-06	0.805164	0.00306	1	0.0177125	0.593583	0.000101111
M174T884	M174T884	0.00274	0.09853	2.49e-06	0.406002	4.91e-05	0.676708	0.0042088	0.0497121	1.8e-06	0.483335	0.002455	0.825253	0.026305	0.134357	4.5e-05
M542T782	LPC(20:5/0:0)	0.00309	0.71119	0.00382	0.0004715	0.222428	0.201304	0.102515	0.0901004	1	0.00142879	0.855492	0.319531	0.183062	0.214525	1
M136T659	M136T659	0.0049	0.2035	3.35e-07	0.142707	2.73e-05	0.601585	0.0127167	0.0077279	7e-07	0.230172	0.00273	0.7615	0.042389	0.0386395	2.33333e-05
M262T155	M262T155	0.00599	0.02331	0.00354	0.999204	0.935557	0.0034086	0.967209	0.002377	0.0008629	1	1	0.00897	1	0.059425	0.0043145
M518T779	LPC(18:3/0:0)	0.00781	0.93422	0.00707	0.001625	0.170299	0.179593	0.29022	0.231801	0.999782	0.00464286	0.851493	0.289666	0.491898	0.482919	1
M433T466	1-pentadecanoyl-glycero-3-phosphate	0.03687	0.34924	0.00254	0.883733	0.355038	0.138597	0.774592	0.0276585	0.0027698	0.901768	0.986217	0.238961	1	0.092195	0.0115408
M169T799	3-Aminopropionaldehyde	0.05937	0.11127	0.00373	0.0052293	0.699207	0.994005	0.093521	0.010333	0.835748	0.0134085	1	1	0.173187	0.0492048	0.852804
M500T792	LPE(20:4/0:0)	0.05938	0.2076	0.00379	0.005391	0.552426	0.958496	0.154304	0.0198351	0.834945	0.0134775	1	1	0.270709	0.0708396	0.860768
M307T837	FA(20:2)	0.076519	0.627328	0.000933	0.0026756	0.129958	0.769586	0.456003	0.0331503	0.56324	0.00723135	0.812236	0.927212	0.760005	0.100455	0.605635
M209T455	L-kynurenine	0.09721	0.69704	0.00511	0.819998	0.260448	0.451422	0.738988	0.102892	0.0107929	0.845359	0.840155	0.578746	1	0.239285	0.0317438
M235T436	N'-formylkynurenine	0.1096	0.3348	0.0073	0.857202	0.0470172	0.959995	0.22559	0.577453	0.0146202	0.892918	0.587715	1	0.388949	0.978735	0.0384742
M130T262	N4-Acetylaminobutanal	0.1789	0.1977	0.0202	0.880383	0.840656	0.247073	0.999535	0.0570787	0.0523853	0.907612	1	0.358076	1	0.150207	0.0858775
M542T774	M542T774	0.18866	0.01685	0.00225	0.516096	0.927677	0.0483315	0.881243	0.0012874	0.0129645	0.567138	1	0.0929452	1	0.06437	0.0350392
M437T802	ST 24:6;O6	0.2167	0.3521	0.0119	0.0458839	0.0680329	0.414392	0.999612	0.646269	0.726377	0.0917678	0.52333	0.545253	0.999612	1	0.756643
M524T799	LPC(P-16:0/0:0)	0.23556	0.04677	0.00318	0.517367	0.838535	0.116828	0.955067	0.0040671	0.0202944	0.562356	1	0.208622	1	0.0369736	0.0471963
M228T138	M228T138	0.23908	0.33861	0.00548	0.0281334	0.480841	0.997852	0.496955	0.0432261	0.588504	0.0654265	0.981309	1	0.814681	0.123503	0.626068
M277T550	M277T550	0.24532	0.18035	0.00189	0.465119	0.0097407	0.999549	0.234651	0.529704	0.0127771	0.547198	0.194814	1	0.40457	0.897804	0.0354919
M556T808	M556T808	0.24669	0.02394	0.00327	0.505899	0.926203	0.0789034	0.876293	0.0022904	0.0220335	0.562109	1	0.148874	1	0.0763467	0.0478989
M424T711	Pentadecanoylcarnitine	0.24705	0.04947	0.00286	0.488503	0.815778	0.126441	0.954947	0.0039763	0.019917	0.555117	1	0.221827	1	0.039763	0.048578
M482T839	LPC(O-16:0/0:0)	0.26166	0.03318	0.00452	0.543546	0.922272	0.103023	0.90496	0.0038617	0.0289274	0.57824	1	0.187315	1	0.0429078	0.0578548
M390T867	N-stearoyltaurine	0.27064	0.47878	0.00806	0.0417371	0.440054	0.990239	0.63898	0.0820443	0.618537	0.0869523	1	1	1	0.200108	0.651091
M454T781	N-Stearoyl phenylalanine	0.28884	0.05385	0.00395	0.496549	0.844695	0.153486	0.942915	0.0054081	0.0291999	0.55792	1	0.251616	1	0.036054	0.0572547
M468T808	LPE(O-18:0)	0.3273	0.0767	0.0025	0.394311	0.71412	0.213162	0.960763	0.0054425	0.0247229	0.480867	1	0.327942	1	0.0340156	0.051506
M484T753	LPE(O-16:0/0:0)	0.39754	0.05667	0.00609	0.471647	0.889388	0.211554	0.894961	0.0077258	0.0551743	0.548427	1	0.330553	1	0.0406621	0.0889908
M688T851	Sm(d18:0/14:1(9z)(oh))	0.41734	0.13657	0.00712	0.48692	0.758421	0.364286	0.976271	0.0197165	0.0632008	0.559678	1	0.499021	1	0.0758327	0.0987512
M408T712	3-hydroxytridecanoyl carnitine	0.42308	0.05887	0.00118	0.238383	0.649886	0.229052	0.896561	0.0024988	0.0209903	0.335751	1	0.336841	1	0.049976	0.0477052
M293T92	M293T92	0.4299	0.6935	0.0018	0.0285218	0.159516	0.990923	0.890932	0.0567934	0.265103	0.0648223	0.839558	1	1	0.149456	0.30826
M594T838	PS(22:0)	0.44316	0.0516	0.00332	0.348852	0.828757	0.221796	0.86165	0.0045929	0.0430043	0.447246	1	0.331038	1	0.0382742	0.0741453
M496T869	M496T869	0.4607	0.0937	0.012	0.539969	0.89717	0.3207	0.927145	0.0198118	0.0980963	0.580612	1	0.451691	1	0.073377	0.136245
M533T762	M533T762	0.46569	0.02274	0.00549	0.402143	0.967379	0.145646	0.703901	0.003217	0.0633483	0.48451	1	0.242743	1	0.0402125	0.0974589
M505T754	M505T754	0.48303	0.09934	0.00182	0.256136	0.608198	0.344486	0.934336	0.0056457	0.0325255	0.355745	1	0.478453	1	0.031365	0.0613689
M442T685	Phytosphingosine-1-p	0.48685	0.78016	0.00447	0.0584186	0.2144	0.989768	0.938388	0.112622	0.348013	0.114546	0.8576	1	1	0.25596	0.386681
M586T801	M586T801	0.5245	0.0464	0.0049	0.352391	0.891454	0.246027	0.796139	0.0055144	0.0674842	0.446065	1	0.356561	1	0.0324376	0.102249
M307T1135	FA 18:4;O3	0.5928	0.5858	0.0131	0.137693	0.454609	1	0.90713	0.138452	0.456214	0.229489	0.98828	1	1	0.307672	0.495885
M456T707	M456T707	0.59864	0.38332	0.00495	0.0791874	0.428805	0.995315	0.810429	0.0468817	0.307817	0.14941	1	1	1	0.130227	0.349792
M426T731	N-Palmitoyl phenylalanine	0.638	0.0893	0.006	0.322096	0.81636	0.414313	0.849379	0.0116317	0.0966225	0.42381	1	0.552417	1	0.0528714	0.136088
M470T730	M470T730	0.67764	0.0823	0.00681	0.319315	0.847818	0.420506	0.815261	0.0117928	0.112757	0.425754	1	0.546112	1	0.051273	0.150343
M496T759	Glucosylsphingosine	0.6834	0.1952	0.0041	0.257881	0.581225	0.621	0.947867	0.0195457	0.0836254	0.353262	1	0.77625	1	0.0781828	0.122979
M550T819	M550T819	0.69391	0.2128	0.00794	0.337151	0.67222	0.649544	0.952334	0.0331212	0.124485	0.437858	1	0.801906	1	0.103504	0.163796
M214T200	Hydroxypropionylcarnitine	0.775493	0.943114	0.000763	0.0413399	0.06325	0.998628	0.999477	0.0590109	0.0878416	0.0879572	0.575	1	1	0.15131	0.125488
M299T97	Glycerophosphocholine	0.7842	0.1435	0.0102	0.166331	0.803055	0.831953	0.654827	0.0263918	0.325294	0.252017	1	0.99042	1	0.0910062	0.365498
M448T445	M448T445	0.82121	0.26443	0.00031	0.0258327	0.180458	0.922268	0.844761	0.0050919	0.0509433	0.0615064	0.820265	1	1	0.0363707	0.0835136
M688T908	Sm(d18:0/14:1(9z)(oh))	0.89527	0.04097	0.00254	0.139544	0.830157	0.405183	0.566566	0.0030724	0.0990117	0.228761	1	0.547545	0.913816	0.0438914	0.135632
M429T1057	Cholesteryl acetate or 3-β-Hydroxy-4-β-methyl-5-α-cholest-7-ene-4-α-carbaldehyde	0.91838	0.50042	0.00477	0.153636	0.057575	0.946195	0.951431	0.384068	0.172959	0.240057	0.639722	1	1	0.685835	0.216198
M387T675	M387T675	0.91961	0.77953	0.00182	0.123519	0.0602355	0.999305	0.977982	0.157233	0.0784783	0.212964	0.602355	1	0.997941	0.341811	0.117132
M505T838	M505T838	0.93756	0.2373	0.00634	0.17155	0.604804	0.861905	0.851076	0.032053	0.206029	0.252279	1	1	1	0.103397	0.248228
M552T905	LPC(P-18:0/0:0)	0.9945	0.3412	0.0044	0.161452	0.443108	0.904677	0.940054	0.0380122	0.151916	0.248388	1	1	1	0.111801	0.194764
Abbreviation: F_C, Control Females ; F_E, Exposed Females ; M_C, Control Males ; M_E, Exposed Males
